# Supplementary material for: Identifying Factors Influencing Attention in Adolescents with a Co-Created Questionnaire: A Citizen Science Approach with Secondary Students in Barcelona, Spain
Source: MDPI journal article supplement (doi:10.3390/ijerph18158221), 2021-08-03
Supplement: s1 [file s1]

# SUPPLEMENTARY MATERIAL

**Table S1.** Crude associations between adolescent's HRT–SE and factors included in the questionnaire (n = 1,658)

| Factors                                                                | Total n (%)  | Change (%) <sup>a</sup> , (95% CI) | p-value |
|------------------------------------------------------------------------|--------------|------------------------------------|---------|
| <i>Category 1: Social relationships and interactions</i>               |              |                                    |         |
| <b>Family relationship quality</b>                                     |              |                                    |         |
| Good                                                                   | 1104 (66.63) | Ref.                               |         |
| Stable                                                                 | 456 (27.52)  | 3.24 (–2.21, 8.68)                 | 0.24    |
| Bad                                                                    | 97 (5.85)    | 0.31 (–9.776, 10.37)               | 0.95    |
| <b>Classmates relationship quality</b>                                 |              |                                    |         |
| Good                                                                   | 1557 (94.02) | Ref.                               |         |
| Not very good                                                          | 84 (5.07)    | 15.78 (3.51, 28.04)                | 0.01*   |
| Bad                                                                    | 15 (0.91)    | 21.37 (–8.40, 51.16)               | 0.16    |
| <b>Bullying victimization</b>                                          |              |                                    |         |
| No                                                                     | 1638 (98.97) | Ref.                               |         |
| Yes                                                                    | 17 (1.03)    | 24.20 (–4.47, 52.86)               | 0.10    |
| <b>Peer and family conflict</b>                                        |              |                                    |         |
| No                                                                     | 1164 (70.29) | Ref.                               |         |
| Yes                                                                    | 492 (29.71)  | 8.80 (3.27, 14.33)                 | < 0.01* |
| <b>Feelings of love</b>                                                |              |                                    |         |
| No                                                                     | 864 (52.24)  | Ref.                               |         |
| Yes, but it doesn't affect me                                          | 602 (36.40)  | 6.70 (1.34, 12.06)                 | 0.01*   |
| Yes, and it affects me                                                 | 188 (11.37)  | 8.54 (0.28, 16.81)                 | 0.04*   |
| <i>Category 2: Psychological and physical health</i>                   |              |                                    |         |
| <b>Self-rated health</b>                                               |              |                                    |         |
| Good                                                                   | 1162 (70.30) | Ref.                               |         |
| Regular                                                                | 459 (27.77)  | 2.63 (–2.72, 7.98)                 | 0.34    |
| Bad                                                                    | 32 (1.94)    | 22.91 (2.07, 43.75)                | 0.03*   |
| <b>Medication intake</b>                                               |              |                                    |         |
| No                                                                     | 1427 (86.38) | Ref.                               |         |
| Yes                                                                    | 225 (13.62)  | 10.50 (3.00, 17.99)                | 0.01*   |
| <b>Medication effect</b>                                               |              |                                    |         |
| No                                                                     | 189 (84.00)  | Ref.                               |         |
| Yes                                                                    | 36 (16.00)   | 8.98 (–10.37, 28.34)               | 0.36    |
| <b>Mental or physical effort</b>                                       |              |                                    |         |
| No                                                                     | 1377 (83.25) | Ref.                               |         |
| Yes                                                                    | 277 (16.75)  | 3.59 (–2.88, 10.06)                | 0.28    |
| <b>Significant life event</b>                                          |              |                                    |         |
| No                                                                     | 1066 (64.45) | Ref.                               |         |
| Yes                                                                    | 588 (35.55)  | 0.74 (–4.16, 5.64)                 | 0.77    |
| <b>Period pain</b>                                                     |              |                                    |         |
| No                                                                     | 228 (13.85)  | Ref.                               |         |
| I am a boy                                                             | 775 (47.08)  | –0.29 (–7.39, 6.81)                | 0.94    |
| Yes, but I don't have it today                                         | 535 (32.50)  | 10.91 (2.62, 19.20)                | 0.01*   |
| Yes, and today I have it                                               | 108 (6.56)   | 7.68 (–4.20, 19.57)                | 0.21    |
| <b>Chronic pain</b>                                                    |              |                                    |         |
| No                                                                     | 1570 (95.21) | Ref.                               |         |
| Yes                                                                    | 79 (4.79)    | 4.59 (–6.86, 16.04)                | 0.43    |
| <i>Category 3 : Eating habits and addictive–substances consumption</i> |              |                                    |         |
| <b>Healthy diet</b>                                                    |              |                                    |         |
| No                                                                     | 271 (16.41)  | Ref.                               |         |
| Yes                                                                    | 1380 (83.59) | –5.44 (–11.38, 0.49)               | 0.07    |

|                                  |              |                       |  |         |
|----------------------------------|--------------|-----------------------|--|---------|
| <b>Eating frequency</b>          |              |                       |  |         |
| Less than 4 times                | 349 (21.13)  | Ref.                  |  |         |
| 4 times or more                  | 1303 (78.87) | -6.68 (-12.00, -1.37) |  | 0.01*   |
| <b>Breakfast</b>                 |              |                       |  |         |
| No                               | 347 (20.94)  | Ref.                  |  |         |
| Yes                              | 1310 (79.06) | -6.98 (-12.30, -1.67) |  | 0.01*   |
| <b>Tobacco smoking</b>           |              |                       |  |         |
| No                               | 1370 (84.36) | Ref.                  |  |         |
| Sometimes                        | 166 (10.22)  | 8.84 (0.45, 17.22)    |  | 0.04*   |
| Yes                              | 88 (5.42)    | 29.52 (16.17, 42.87)  |  | < 0.01* |
| <b>Alcohol consumption</b>       |              |                       |  |         |
| No                               | 1182 (72.60) | Ref.                  |  |         |
| Sometimes                        | 393 (24.14)  | 7.12 (1.28, 12.96)    |  | 0.02*   |
| Yes                              | 53 (3.26)    | 36.91 (18.90, 54.91)  |  | < 0.01* |
| <b>Marijuana use</b>             |              |                       |  |         |
| No                               | 1487 (92.42) | Ref.                  |  |         |
| Sometimes                        | 87 (5.41)    | 17.70 (5.55, 29.85)   |  | < 0.01* |
| Yes                              | 35 (2.18)    | 36.32 (14.50, 58.13)  |  | < 0.01* |
| <b>Energy drinks consumption</b> |              |                       |  |         |
| No                               | 740 (45.04)  | Ref.                  |  |         |
| Sometimes                        | 569 (34.63)  | 6.84 (1.21, 12.47)    |  | 0.02*   |
| Yes                              | 334 (20.33)  | 9.60 (2.77, 16.43)    |  | 0.01    |
| <b>Drugs use</b>                 |              |                       |  |         |
| No                               | 1544 (96.08) | Ref.                  |  |         |
| Sometimes                        | 43 (2.68)    | 7.29 (-8.34, 22.91)   |  | 0.36    |
| Yes                              | 20 (1.24)    | 27.29 (0.31, 54.27)   |  | 0.05    |

**Category 4: Use of technology and other habits**

|                                   |              |                        |  |         |
|-----------------------------------|--------------|------------------------|--|---------|
| <b>Mobile phone use</b>           |              |                        |  |         |
| Every less than 30 m              | 639 (38.59)  | Ref.                   |  |         |
| Between 30 m–60 m                 | 696 (42.03)  | -11.69 (-16.25, -7.13) |  | < 0.01* |
| Every more than 60 m              | 307 (18.54)  | -9.26 (-15.20, -3.32)  |  | < 0.01* |
| I don't have mobile               | 14 (0.85)    | -16.20 (-37.53, 5.13)  |  | 0.14    |
| <b>Mobile notification</b>        |              |                        |  |         |
| No                                | 602 (36.37)  | Ref.                   |  |         |
| Yes                               | 1053 (63.63) | 7.62 (2.42, 12.82)     |  | < 0.01* |
| <b>Before-bed habits</b>          |              |                        |  |         |
| Relaxing activities               | 181 (10.95)  | Ref.                   |  |         |
| Read                              | 162 (9.80)   | -4.58 (-14.35, 5.18)   |  | 0.36    |
| Homework                          | 72 (4.36)    | 1.26 (-12.09, 14.62)   |  | 0.85    |
| Mobile phone, computer or TV      | 1214 (73.44) | 6.67 (-1.37, 14.72)    |  | 0.10    |
| Stress-busting activities         | 24 (1.45)    | 2.88 (-18.27, 24.02)   |  | 0.79    |
| <b>Weekly exercise hours</b>      |              |                        |  |         |
| Less than 7 h                     | 1099 (67.01) | Ref.                   |  |         |
| 7 h or more                       | 541 (32.99)  | -8.16 (-12.72, -3.61)  |  | < 0.01* |
| <b>Regular reader</b>             |              |                        |  |         |
| No                                | 1144 (69.33) | Ref.                   |  |         |
| Yes                               | 506 (30.67)  | -9.41 (-13.96, -4.85)  |  | < 0.01* |
| <b>Productive time of the day</b> |              |                        |  |         |
| Morning                           | 480 (28.99)  | Ref.                   |  |         |
| Noon                              | 383 (23.13)  | -2.48 (-8.82, 3.85)    |  | 0.44    |
| Afternoon                         | 528 (31.88)  | 0.11 (-5.88, 6.10)     |  | 0.97    |
| Evening                           | 265 (16.00)  | -1.91 (-9.03, 5.21)    |  | 0.54    |

**Category 5: Other personal conditions before and during the test**

|                                    |             |                       |  |      |
|------------------------------------|-------------|-----------------------|--|------|
| <b>Hours of sleep</b>              |             |                       |  |      |
| Less than 8 h                      | 940 (58.06) | Ref.                  |  |      |
| Between 8 h and 10 h               | 669 (41.32) | -0.22 (-5.00, 4.57)   |  | 0.93 |
| > 10 h                             | 10 (0.62)   | -0.69 (-30.63, 29.27) |  | 0.97 |
| <b>Time without drinking water</b> |             |                       |  |      |
| Less than 1                        | 122 (7.36)  | Ref.                  |  |      |
| From 1 to 3                        | 777 (46.86) | -9.21 (-17.58, -0.84) |  | 0.03 |

|                                                                   |              |                        |         |
|-------------------------------------------------------------------|--------------|------------------------|---------|
| More than 3                                                       | 759 (45.78)  | -9.82 (-18.15, -1.49)  | 0.02    |
| <b>Need to go to the toilet</b>                                   |              |                        |         |
| No                                                                | 1406 (84.80) | Ref.                   |         |
| Yes                                                               | 252 (15.20)  | 7.64 (0.67, 14.61)     | 0.03*   |
| <b>Interest in the experiment</b>                                 |              |                        |         |
| No                                                                | 166 (10.04)  | Ref.                   |         |
| Yes                                                               | 1488 (89.96) | -12.55 (-19.32, -5.79) | < 0.01* |
| <b>Exam</b>                                                       |              |                        |         |
| No                                                                | 1392 (83.96) | Ref.                   |         |
| Yes                                                               | 266 (16.04)  | -5.06 (-11.08, 0.96)   | 0.10    |
| <b>Bad news received</b>                                          |              |                        |         |
| No                                                                | 1166 (70.37) | Ref.                   |         |
| Yes                                                               | 491 (29.63)  | 8.33 (2.72, 13.72)     | < 0.01* |
| <b>Hours bad news received</b>                                    |              |                        |         |
| < 12 h                                                            | 122 (25.79)  | Ref.                   |         |
| Between 12 h and 24 h                                             | 176 (37.21)  | -6.89 (-17.57, 3.79)   | 0.21    |
| > 24 h                                                            | 175 (37.00)  | -2.86 (-14.02, 8.30)   | 0.62    |
| <b>Category 6: Perceived classroom conditions during the test</b> |              |                        |         |
| <b>Noise in classroom</b>                                         |              |                        |         |
| No                                                                | 817 (49.28)  | Ref.                   |         |
| Yes                                                               | 841 (50.72)  | -5.66 (-10.04, -1.27)  | 0.01*   |
| <b>Temperature in classroom</b>                                   |              |                        |         |
| OK                                                                | 1136 (68.64) | Ref.                   |         |
| Hot                                                               | 199 (12.02)  | -0.36 (-7.63, 6.90)    | 0.92    |
| Cold                                                              | 320 (19.34)  | -0.01 (-6.02, 5.99)    | 1.00    |
| <b>Smelly classroom</b>                                           |              |                        |         |
| No                                                                | 1531 (92.56) | Ref.                   |         |
| Yes                                                               | 123 (7.44)   | 1.23 (-7.76, 10.22)    | 0.79    |

Note: CI, confidence interval; HRT-SE, hit reaction time standard error (ms)

<sup>a</sup> Associations are estimated using linear regression and reported as percent change in the median of the outcome. \* statistical significance at the 0.05 level.

**Table S2.** Crude associations between secondary attention outcomes and factors included in the questionnaire (n = 1,658)

| Factors                                                                | Impulsivity                 |          | Selective attention score   |          | Alerting score           |         | Orienting score          |          | Executive attention      |          |
|------------------------------------------------------------------------|-----------------------------|----------|-----------------------------|----------|--------------------------|---------|--------------------------|----------|--------------------------|----------|
|                                                                        | Change (count),<br>(95% CI) | p-values | Change (count), (95%<br>CI) | p-values | Change (ms),<br>(95% CI) | p-value | Change (ms),<br>(95% CI) | p-values | Change (ms),<br>(95% CI) | p-values |
| <i>Category 1: Social relationships and interactions</i>               |                             |          |                             |          |                          |         |                          |          |                          |          |
| <b>Family relationship quality (ref. Good)</b>                         |                             |          |                             |          |                          |         |                          |          |                          |          |
| Stable                                                                 | 0.23 (−0.19,0.65)           | 0.28     | 0.09 (−0.07, 0.26)          | 0.28     | 2.51 (−3.66, 8.69)       | 0.42    | 1.62 (−4.38, 7.61)       | 0.59     | 1.10 (−4.15, 6.35)       | 0.68     |
| Bad                                                                    | 1.05 (0.26, 1.85)           | 0.01*    | 0.28 (−0.03, 0.60)          | 0.08     | −4.34 (−16.08, 7.40)     | 0.47    | 0.23 (−11.18, 11.64)     | 0.97     | 5.46 (−4.53, 15.44)      | 0.28     |
| <b>Classmates relationship quality (ref. Good)</b>                     |                             |          |                             |          |                          |         |                          |          |                          |          |
| Not very good                                                          | 0.40 (−0.46, 1.26)          | 0.36     | 0.23 (−0.10, 0.56)          | 0.18     | −2.47 (−14.89, 9.95)     | 0.70    | 9.12 (−2.94, 21.18)      | 0.14     | 0.03 (−10.44, 10.50)     | 1.00     |
| Bad                                                                    | 2.90 (0.92, 4.89)           | 0.01*    | 1.29 (0.52, 2.06)           | < 0.01*  | 37.50 (8.73, 66.26)      | 0.01*   | −15.03 (−42.96, 12.90)   | 0.29     | 58.70 (34.44, 82.95)     | < 0.01*  |
| <b>Bullying victimization (ref. No)</b>                                |                             |          |                             |          |                          |         |                          |          |                          |          |
| Yes                                                                    | 1.33 (−0.54, 3.20)          | 0.16     | 0.65 (−0.07, 1.37)          | 0.08     | 17.51 (−9.56, 44.57)     | 0.21    | 4.71 (−21.56, 30.97)     | 0.73     | 25.26 (2.35, 48.16)      | 0.03*    |
| <b>Peer and family conflict (ref. No)</b>                              |                             |          |                             |          |                          |         |                          |          |                          |          |
| Yes                                                                    | 0.32 (−0.10, 0.73)          | 0.12     | 0.08 (−0.08, 0.24)          | 0.30     | 6.73 (0.77, 12.70)       | 0.03*   | 1.41 (−4.39, 7.20)       | 0.63     | 2.00 (−3.07, 7.08)       | 0.44     |
| <b>Feelings of love (ref. No)</b>                                      |                             |          |                             |          |                          |         |                          |          |                          |          |
| Yes, but it doesn’t affect me                                          | 0.45 (0.04, 0.86)           | 0.03*    | 0.05 (−0.11, 0.21)          | 0.54     | 7.61 (1.72, 13.50)       | 0.01*   | −0.21 (−5.51, 5.93)      | 0.94     | 5.67 (0.67, 10.68)       | 0.03*    |
| Yes, and it affects me                                                 | 0.64 (0.02, 1.25)           | 0.04*    | 0.17 (−0.06, 0.41)          | 0.15     | 0.82 (−8.10, 9.75)       | 0.86    | 6.24 (−2.44, 14.91)      | 0.16     | 3.54 (−4.04, 11.13)      | 0.36     |
| <i>Category 2: Psychological and physical health</i>                   |                             |          |                             |          |                          |         |                          |          |                          |          |
| <b>Self-rated health (ref. Good)</b>                                   |                             |          |                             |          |                          |         |                          |          |                          |          |
| Regular                                                                | 0.03 (−0.39, 0.45)          | 0.90     | 0.05 (−0.11, 0.21)          | 0.56     | 0.27 (−5.84, 6.39)       | 0.93    | 0.82 (−5.12, 6.76)       | 0.79     | −1.37 (−6.56, 3.83)      | 0.61     |
| Bad                                                                    | −0.27 (−1.64, 1.10)         | 0.70     | 0.37 (−0.16, 0.90)          | 0.18     | 13.62 (−6.25, 33.50)     | 0.18    | −6.62 (−25.92, 12.69)    | 0.50     | 6.36 (−10.54, 23.26)     | 0.46     |
| <b>Medication intake (ref. No)</b>                                     |                             |          |                             |          |                          |         |                          |          |                          |          |
| Yes                                                                    | 0.32 (−0.23, 0.88)          | 0.25     | 0.36 (0.15, 0.57)           | < 0.01*  | 4.65 (−3.31, 12.60)      | 0.25    | 1.30 (−6.43, 9.03)       | 0.74     | −0.58 (−7.34, 6.19)      | 0.87     |
| <b>Medication effect (ref. No)</b>                                     |                             |          |                             |          |                          |         |                          |          |                          |          |
| Yes                                                                    | 0.01 (−1.46, 1.47)          | 0.99     | −0.11 (−0.86, 0.64)         | 0.78     | −5.71 (−28.86, 17.43)    | 0.63    | 2.01 (−19.16, 23.17)     | 0.85     | 1.42 (−17.54, 20.39)     | 0.88     |
| <b>Mental or physical effort (ref. No)</b>                             |                             |          |                             |          |                          |         |                          |          |                          |          |
| Yes                                                                    | 0.32 (−0.19, 0.82)          | 0.22     | 0.12 (−0.08, 0.32)          | 0.23     | −2.74 (−10.05, 4.57)     | 0.46    | 2.07 (−5.02, 9.17)       | 0.57     | 3.26 (−2.95, 9.48)       | 0.30     |
| <b>Significant life event (ref. No)</b>                                |                             |          |                             |          |                          |         |                          |          |                          |          |
| Yes                                                                    | −0.22 (−0.60, 0.17)         | 0.27     | 0.03 (−0.11, 0.18)          | 0.64     | 2.02 (−3.66, 7.70)       | 0.49    | −2.91 (−8.40, 2.59)      | 0.30     | −0.50 (−5.33, 4.33)      | 0.84     |
| <b>Period pain (ref. No)</b>                                           |                             |          |                             |          |                          |         |                          |          |                          |          |
| I am a boy                                                             | 1.12 (0.55, 1.69)           | < 0.01*  | −0.05 (−0.27, 0.17)         | 0.66     | −1.87 (−10.25, 6.51)     | 0.66    | −2.52 (−10.64, 5.61)     | 0.54     | 2.63 (−4.50, 9.75)       | 0.47     |
| Yes, but I don’t have it today                                         | −0.18 (−0.78, 0.42)         | 0.55     | 0.13 (−0.11, 0.36)          | 0.29     | 2.34 (−6.46, 11.13)      | 0.60    | −1.42 (−9.94, 7.11)      | 0.75     | 0.88 (−6.60, 8.36)       | 0.82     |
| Yes, and today I have it                                               | −0.28 (−1.17, 0.61)         | 0.54     | −0.07 (−0.42, 0.28)         | 0.70     | 5.28 (−7.71, 18.27)      | 0.43    | −2.23 (−14.83, 10.36)    | 0.73     | 2.13 (−8.91, 13.18)      | 0.71     |
| <b>Chronic pain (ref. No)</b>                                          |                             |          |                             |          |                          |         |                          |          |                          |          |
| Yes                                                                    | 0.91 (0.03, 1.80)           | 0.05     | 0.12 (−0.23, 0.46)          | 0.50     | −4.00 (−16.81, 8.80)     | 0.46    | 11.40 (−1.01, 23.81)     | 0.07     | −5.92 (−16.81, 4.97)     | 0.29     |
| <i>Category 3 : Eating habits and addictive-substances consumption</i> |                             |          |                             |          |                          |         |                          |          |                          |          |
| <b>Healthy diet (ref. No)</b>                                          |                             |          |                             |          |                          |         |                          |          |                          |          |
| Yes                                                                    | 0.04 (−0.47, 0.55)          | 0.88     | −0.36 (−0.55, 0.17)         | < 0.01*  | −4.44 (−11.81, 2.94)     | 0.24    | −5.14 (−12.27, 1.99)     | 0.16     | 1.29 (−4.98, 7.55)       | 0.69     |
| <b>Eating frequency (ref. Less than 4 times)</b>                       |                             |          |                             |          |                          |         |                          |          |                          |          |
| 4 times or more                                                        | −0.48 (−0.94, −0.02)        | 0.04*    | −0.11 (−0.29, 0.07)         | 0.21     | −1.28 (−7.96, 5.41)      | 0.71    | 3.19 (−3.30, 9.68)       | 0.34     | −3.62 (−9.29, 2.05)      | 0.21     |
| <b>Breakfast (ref. No)</b>                                             |                             |          |                             |          |                          |         |                          |          |                          |          |
| Yes                                                                    | −0.49 (−0.95, 0.03)         | 0.04*    | −0.10 (−0.28, 0.08)         | 0.28     | −4.24 (−10.94, 2.47)     | 0.22    | −4.57 (−11.07, 1.93)     | 0.17     | −2.40 (−8.10, 3.29)      | 0.41     |
| <b>Tobacco smoking (ref. No)</b>                                       |                             |          |                             |          |                          |         |                          |          |                          |          |
| Sometimes                                                              | −0.35 (−0.97, 0.26)         | 0.26     | 0.03 (−0.21, 0.27)          | 0.80     | 5.70 (−3.43, 14.84)      | 0.22    | −0.75 (−9.62, 8.12)      | 0.87     | −2.85 (−10.35, 4.66)     | 0.46     |
| Yes                                                                    | 0.72 (−0.10, 1.54)          | 0.09     | 0.68 (0.36, 1.01)           | < 0.01*  | −5.15 (−17.37, 7.07)     | 0.41    | 0.01 (−11.86, 11.88)     | 1.00     | 8.01 (−2.03, 18.04)      | 0.12     |
| <b>Alcohol consumption (ref. No)</b>                                   |                             |          |                             |          |                          |         |                          |          |                          |          |
| Sometimes                                                              | 0.09 (−0.35, 0.52)          | 0.69     | 0.22 (0.05, 0.39)           | 0.01*    | 3.78 (−2.67, 10.24)      | 0.25    | 6.97 (0.69, 13.24)       | 0.03*    | 4.24 (−1.10, 9.58)       | 0.12     |
| Yes                                                                    | 1.68 (0.63, 2.72)           | < 0.01*  | 0.80 (0.39, 1.22)           | < 0.01*  | −3.22 (−18.78, 12.34)    | 0.69    | 13.10 (−2.03, 28.23)     | 0.09     | 14.02 (1.14, 26.90)      | 0.03*    |
| <b>Marijuana use (ref. No)</b>                                         |                             |          |                             |          |                          |         |                          |          |                          |          |
| Sometimes                                                              | 0.88 (0.06, 1.70)           | 0.04*    | 0.45 (0.12, 0.77)           | 0.01*    | 7.70 (−4.55, 19.95)      | 0.22    | 11.80 (−0.11, 23.71)     | 0.05     | 3.97 (−6.02, 13.96)      | 0.44     |
| Yes                                                                    | 2.16 (0.88, 3.43)           | < 0.01*  | 1.18 (0.68, 1.69)           | < 0.01*  | −4.82 (−23.81, 14.17)    | 0.62    | 11.30 (−7.16, 29.76)     | 0.23     | 19.85 (4.37, 35.33)      | 0.01*    |
| <b>Energy drinks consumption (ref. No)</b>                             |                             |          |                             |          |                          |         |                          |          |                          |          |
| Sometimes                                                              | 0.48 (0.06, 0.89)           | 0.03*    | 0.16 (−0.01, 0.33)          | 0.06     | 3.55 (−2.63, 9.73)       | 0.26    | −1.29 (−7.31, 4.72)      | 0.67     | 3.22 (−2.05, 8.49)       | 0.23     |
| Yes                                                                    | 0.85 (0.36, 1.35)           | < 0.01*  | 0.28 (0.08, 0.48)           | 0.01*    | 2.50 (−4.81, 9.81)       | 0.50    | 2.28 (−4.83, 9.39)       | 0.53     | −0.23 (−6.46, 5.99)      | 0.94     |
| <b>Drugs use (ref. No)</b>                                             |                             |          |                             |          |                          |         |                          |          |                          |          |
| Sometimes                                                              | 0.98 (−0.18, 2.14)          | 0.09     | 0.13 (−0.33, 0.59)          | 0.57     | 12.05 (−5.10, 29.20)     | 0.17    | −9.22 (−25.94, 7.50)     | 0.28     | 8.10 (−6.01, 22.21)      | 0.26     |

|                                                                         |                      |         |                      |         |                       |         |                        |      |                       |         |
|-------------------------------------------------------------------------|----------------------|---------|----------------------|---------|-----------------------|---------|------------------------|------|-----------------------|---------|
| Yes                                                                     | 0.68 (−1.01, 2.36)   | 0.43    | 0.08 (−0.59, 0.75)   | 0.81    | 32.99 (8.03, 57.96)   | 0.01*   | 5.39 (−18.95, 29.73)   | 0.66 | 2.63 (−17.91, 23.16)  | 0.80    |
| <i>Category 4: Use of technology and other habits</i>                   |                      |         |                      |         |                       |         |                        |      |                       |         |
| <b>Mobile phone use (ref. Every 30 m or less)</b>                       |                      |         |                      |         |                       |         |                        |      |                       |         |
| Between 30 m–60 m                                                       | −0.68 (−1.10, −0.27) | < 0.01* | −0.29 (−0.45, −0.12) | < 0.01* | −2.24 (−8.33, 3.84)   | 0.47    | −0.67 (−6.57, 5.24)    | 0.83 | −4.80 (−9.97, 0.36)   | 0.07    |
| Every more than 60 m                                                    | −0.38 (−0.91, 0.15)  | 0.16    | −0.21 (−0.41, −0.00) | 0.05    | −1.30 (−9.02, 6.41)   | 0.74    | −1.72 (−9.20, 5.77)    | 0.65 | −6.70 (−13.24, −0.15) | 0.05    |
| I don’t have mobile                                                     | −0.81 (−2.87, 1.25)  | 0.44    | −0.26 (−1.06, 0.54)  | 0.52    | 14.94 (−15.06, 44.95) | 0.33    | 11.94 (−17.18, 41.06)  | 0.42 | 3.50 (−21.97, 28.96)  | 0.79    |
| <b>Mobile notification (ref. No)</b>                                    |                      |         |                      |         |                       |         |                        |      |                       |         |
| Yes                                                                     | −0.10 (−0.49, 0.30)  | 0.63    | 0.01 (−0.14, 0.16)   | 0.87    | 0.80 (−4.88, 6.48)    | 0.78    | 4.35 (−1.14, 9.85)     | 0.12 | −0.19 (−5.01, 4.63)   | 0.94    |
| <b>Before–bed habits (ref. Relaxing activities)</b>                     |                      |         |                      |         |                       |         |                        |      |                       |         |
| Read                                                                    | −0.26 (−1.09, 0.57)  | 0.53    | −0.24 (−0.56, 0.08)  | 0.14    | −3.16 (−15.19, 8.86)  | 0.61    | 3.63 (−8.03, 15.29)    | 0.54 | −1.63 (−11.84, 8.57)  | 0.75    |
| Homework                                                                | −0.01 (−1.06, 1.08)  | 0.98    | −0.21 (−0.62, 0.20)  | 0.32    | −4.81 (−20.30, 10.69) | 0.54    | 6.19 (−8.83, 21.21)    | 0.42 | −2.42 (−15.57, 10.73) | 0.72    |
| Mobile phone, computer or TV                                            | 0.30 (−0.31, 0.91)   | 0.34    | 0.12 (−0.12, 0.35)   | 0.34    | −2.53 (−11.39, 6.33)  | 0.58    | 4.53 (−4.06, 13.13)    | 0.30 | 5.05 (−2.47, 12.57)   | 0.19    |
| Stress–busting activities                                               | 0.42 (−1.25, 2.08)   | 0.62    | −0.36 (−1.01, 0.28)  | 0.27    | −14.23 (−38.39, 9.92) | 0.25    | −2.92 (−26.34, 20.50)  | 0.81 | 7.17 (−13.33, 27.67)  | 0.49    |
| <b>Weekly exercise hours (ref. &lt; 7 h)</b>                            |                      |         |                      |         |                       |         |                        |      |                       |         |
| 7 h or more                                                             | 0.28 (−0.12, 0.68)   | 0.17    | −0.19 (−0.35, −0.04) | 0.02*   | −4.76 (−10.57, 1.04)  | 0.11    | 3.12 (−2.54, 8.78)     | 0.28 | −1.69 (−6.65, 3.27)   | 0.50    |
| <b>Regular reader (ref. No)</b>                                         |                      |         |                      |         |                       |         |                        |      |                       |         |
| Yes                                                                     | −0.81 (−1.21, −0.40) | < 0.01* | −0.24 (−0.40, −0.08) | < 0.01* | −0.41 (−6.34, 5.52)   | 0.89    | −2.69 (−8.43, 3.04)    | 0.36 | −4.35 (−9.38, 0.68)   | 0.90    |
| <b>Productive time of the day (ref. Morning)</b>                        |                      |         |                      |         |                       |         |                        |      |                       |         |
| Noon                                                                    | 0.16 (−0.37, 0.68)   | 0.56    | 0.09 (−0.11, 0.29)   | 0.39    | 2.94 (−4.65, 10.54)   | 0.43    | −0.36 (−7.74, 7.01)    | 0.92 | −2.03 (−8.49, 4.43)   | 0.54    |
| Afternoon                                                               | −0.00 (−0.49, 0.48)  | 0.99    | −0.02 (−0.21, 0.16)  | 0.80    | 1.88 (−5.11, 8.87)    | 0.60    | 1.12 (−5.67, 7.91)     | 0.75 | −2.81 (−8.76, 3.13)   | 0.35    |
| Evening                                                                 | 0.20 (−0.38, 0.79)   | 0.50    | 0.13 (−0.09, 0.36)   | 0.25    | −2.39 (−10.87, 6.09)  | 0.58    | 3.39 (−4.86, 11.63)    | 0.42 | −6.04 (−13.25, 1.18)  | 0.10    |
| <i>Category 5: Other personal conditions before and during the test</i> |                      |         |                      |         |                       |         |                        |      |                       |         |
| <b>Hours of sleep (ref. &lt; 8 h)</b>                                   |                      |         |                      |         |                       |         |                        |      |                       |         |
| Between 8 hrs and 10 h                                                  | −0.24 (−0.63, 0.15)  | 0.23    | −0.06 (−0.21, 0.09)  | 0.62    | −1.98 (−7.61, 3.65)   | 0.49    | 0.35 (−5.06, 5.76)     | 0.90 | −0.84 (−5.63, 3.95)   | 0.73    |
| < 10 h                                                                  | −1.14 (−3.59, 1.31)  | 0.36    | −0.05 (−0.99, 0.89)  | 0.40    | 8.85 (−26.52, 44.22)  | 0.62    | 18.86 (−15.13, 52.86)  | 0.28 | −4.41 (−34.52, 25.71) | 0.77    |
| <b>Time without drinking water (ref. Less than 1)</b>                   |                      |         |                      |         |                       |         |                        |      |                       |         |
| From 1 to 3                                                             | −0.42 (−1.16, 0.33)  | 0.27    | −0.31 (−0.60, −0.02) | 0.04*   | −4.79 (−15.60, 6.02)  | 0.39    | 3.24 (−7.25, 13.73)    | 0.55 | −9.11 (−18.29, 0.07)  | 0.05    |
| More than 3                                                             | −0.51 (−1.26, 0.23)  | 0.18    | −0.31 (−0.60, 0.02)  | 0.04*   | −4.04 (−14.87, 6.79)  | 0.47    | 2.51 (−7.99, 13.02)    | 0.64 | −8.43 (−17.62, 0.76)  | 0.07    |
| <b>Need to go to the toilet (ref. No)</b>                               |                      |         |                      |         |                       |         |                        |      |                       |         |
| Yes                                                                     | 0.17 (−0.36, 0.69)   | 0.53    | 0.02 (−0.18, 0.23)   | 0.82    | −3.00 (−10.59, 4.59)  | 0.44    | 1.38 (−5.98, 8.75)     | 0.71 | 0.45 (−6.01, 6.90)    | 0.89    |
| <b>Interest in the experiment (ref. No)</b>                             |                      |         |                      |         |                       |         |                        |      |                       |         |
| Yes                                                                     | −0.85 (−1.48, −0.23) | 0.01*   | −0.36 (−0.60, −0.12) | < 0.01* | 1.83 (−10.92, 7.25)   | 0.69    | −1.77 (−10.58, 7.05)   | 0.69 | −0.88 (−8.60, 6.85)   | 0.82    |
| <b>Exam (ref. No)</b>                                                   |                      |         |                      |         |                       |         |                        |      |                       |         |
| Yes                                                                     | 0.09 (−0.42, 0.60)   | 0.73    | −0.20 (−0.40, −0.01) | 0.04*   | −5.93 (−13.36, 1.49)  | 0.12    | −0.81 (−8.02, 6.40)    | 0.83 | −6.92 (−13.22, −0.62) | 0.03*   |
| <b>Bad news received (ref. No)</b>                                      |                      |         |                      |         |                       |         |                        |      |                       |         |
| Yes                                                                     | 0.35 (−0.06, 0.76)   | 0.09    | 0.26 (0.10, 0.41)    | < 0.01* | 0.99 (−4.97, 6.95)    | 0.74    | 0.81 (−4.98, 6.61)     | 0.78 | 0.60 (−4.47, 5.67)    | 0.82    |
| <b>Hours bad news received (ref. &lt; 12 h)</b>                         |                      |         |                      |         |                       |         |                        |      |                       |         |
| Between 12 h and 24 h                                                   | 0.24 (−0.70, 1.18)   | 0.61    | −0.61 (−1.05, −0.16) | 0.01*   | 21.25 (7.07, 35.43)   | < 0.01* | −9.65 (−23.79, 4.48)   | 0.18 | 5.76 (−5.12, 16.64)   | 0.30    |
| > 24 h                                                                  | −0.22 (−1.16, 0.72)  | 0.65    | −0.64 (−1.09, −0.19) | 0.01*   | 6.49 (−7.70, 20.69)   | 0.37    | −14.37 (−28.52, −0.23) | 0.05 | 1.08 (−9.81, 11.97)   | 0.85    |
| <i>Category 6: Perceived classroom conditions during the test</i>       |                      |         |                      |         |                       |         |                        |      |                       |         |
| <b>Noise in classroom (ref. No)</b>                                     |                      |         |                      |         |                       |         |                        |      |                       |         |
| Yes                                                                     | 0.23 (−0.16, 0.60)   | 0.25    | 0.02 (−0.13, 0.16)   | 0.81    | −4.26 (−9.71, 1.19)   | 0.13    | 0.30 (−4.99, 5.59)     | 0.91 | −6.95 (−11.57, −2.33) | < 0.01* |
| <b>Temperature in classroom (ref. Ok)</b>                               |                      |         |                      |         |                       |         |                        |      |                       |         |
| Hot                                                                     | 0.38 (−0.21, 0.96)   | 0.21    | −0.07 (−0.30, 0.16)  | 0.56    | 1.33 (−7.20, 9.85)    | 0.76    | 5.36 (−2.91, 13.63)    | 0.20 | −2.11 (−9.36, 5.14)   | 0.57    |
| Cold                                                                    | 0.06 (−0.42, 0.55)   | 0.80    | 0.03 (−0.16, 0.22)   | 0.83    | 6.08 (−0.94, 13.10)   | 0.09    | 4.88 (−1.93, 11.69)    | 0.16 | −3.11 (−9.08, 2.86)   | 0.31    |
| <b>Smelly classroom (ref. No)</b>                                       |                      |         |                      |         |                       |         |                        |      |                       |         |
| Yes                                                                     | 0.91 (0.20, 1.64)    | 0.01*   | 0.10 (−0.18, 0.38)   | 0.47    | 6.09 (−4.31, 16.49)   | 0.25    | −7.55 (−17.64, 2.54)   | 0.14 | 0.29 (−8.56, 9.13)    | 0.95    |

Associations are estimated using linear regression and reported as additive change in the mean of outcome. \* statistical significance at the 0.05 level.

**Table S3.** Adjusted association between attentiveness (HRT–SE) and factors included in the questionnaire that showed a significant crude association (n = 1,658)

| Variables                                                                   | Change (%) | 95% CI          | p-values |
|-----------------------------------------------------------------------------|------------|-----------------|----------|
| <i>Category 1: Social relationships and interactions</i>                    |            |                 |          |
| <b>Classmates relationship quality</b> (ref. Good)                          |            |                 |          |
| Not very good                                                               | 14.33      | (3.37, 25.29)   | 0.01*    |
| Bad                                                                         | 0.74       | (–21.77, 23.25) | 0.95     |
| <b>Peer and family conflict</b> (ref. No)                                   |            |                 |          |
| Yes                                                                         | 5.61       | (0.67, 10.52)   | 0.03*    |
| <b>Feelings of love</b> (ref. No)                                           |            |                 |          |
| Yes, but it doesn't affect me                                               | 3.25       | (–1.44, 7.94)   | 0.17     |
| Yes, and it affects me                                                      | 2.01       | (–5.02, 9.04)   | 0.58     |
| <i>Category 2: Psychological and physical health</i>                        |            |                 |          |
| <b>Self-rated health</b> (ref. Good)                                        |            |                 |          |
| Regular                                                                     | 3.38       | (–1.52, 8.29)   | 0.18     |
| Bad                                                                         | 16.32      | (–1.41, 34.05)  | 0.07     |
| <b>Medication intake</b> (ref. No)                                          |            |                 |          |
| Yes                                                                         | 9.98       | (3.26, 16.69)   | < 0.01*  |
| <b>Period pain</b> (ref. No)                                                |            |                 |          |
| I am a boy                                                                  | 0.10       | (–14.44, 14.63) | 0.99     |
| Yes, but I don't have it today                                              | 8.12       | (0.67, 15.57)   | 0.03*    |
| Yes, and today I have it                                                    | 5.08       | (–5.38, 15.53)  | 0.34     |
| <i>Category 3 : Eating habits and addictive-substances consumption</i>      |            |                 |          |
| <b>Eating frequency</b> (ref. < 4 times)                                    |            |                 |          |
| 4 times or more                                                             | –0.54      | (–5.75, 4.68)   | 0.84     |
| <b>Breakfast</b> (ref. No)                                                  |            |                 |          |
| Yes                                                                         | –2.78      | (–7.85, 2.29)   | 0.28     |
| <b>Tobacco smoking</b> (ref. No)                                            |            |                 |          |
| Sometimes                                                                   | 5.74       | (–1.70, 13.18)  | 0.13     |
| Yes                                                                         | 16.19      | (5.07, 27.32)   | < 0.01*  |
| <b>Alcohol consumption</b> (ref. No)                                        |            |                 |          |
| Sometimes                                                                   | 3.40       | (–1.79, 8.58)   | 0.20     |
| Yes                                                                         | 17.22      | (2.98, 31.46)   | 0.02*    |
| <b>Marijuana use</b> (ref. No)                                              |            |                 |          |
| Sometimes                                                                   | 10.09      | (–0.26, 20.44)  | 0.06     |
| Yes                                                                         | 21.54      | (3.76, 39.32)   | 0.02*    |
| <b>Energy drinks consumption</b> (ref. No)                                  |            |                 |          |
| Sometimes                                                                   | 4.06       | (–0.97, 9.09)   | 0.11     |
| Yes                                                                         | 4.95       | (–1.16, 11.07)  | 0.11     |
| <i>Category 4: Use of technology and other habits</i>                       |            |                 |          |
| <b>Mobile phone use</b> (ref. Every 30 m or less)                           |            |                 |          |
| Between 30 m–60 m                                                           | –5.34      | (–9.82, –0.87)  | 0.02*    |
| Every more than 60 m                                                        | –5.30      | (–10.92, 0.32)  | 0.07     |
| I don't have a mobile                                                       | –22.94     | (–40.86, –5.01) | 0.01*    |
| <b>Mobile notification</b> (ref. No)                                        |            |                 |          |
| Yes                                                                         | 1.74       | (–2.75, 6.23)   | 0.45     |
| <b>Weekly exercise hours</b> (ref. < 7 h)                                   |            |                 |          |
| 7 h or more                                                                 | –3.61      | (–8.05, 0.83)   | 0.11     |
| <b>Regular reader</b> (ref. No)                                             |            |                 |          |
| Yes                                                                         | –5.80      | (–10.29, –1.31) | 0.01*    |
| <i>Category 5: Other personal conditions before and during the test</i>     |            |                 |          |
| <b>Need to go to the toilet</b> (ref. No)                                   |            |                 |          |
| Yes                                                                         | 4.78       | (–1.40, 10.95)  | 0.13     |
| <b>Interest in the experiment</b> (ref. No)                                 |            |                 |          |
| Yes                                                                         | –7.36      | (–13.91, –0.82) | 0.03*    |
| <b>Bad news received</b> (ref. No)                                          |            |                 |          |
| Yes                                                                         | 7.93       | (2.94, 12.92)   | < 0.01*  |
| <i>Category 6: Perceived classroom conditions during the test</i>           |            |                 |          |
| <b>Noise in classroom</b> (ref. No)                                         |            |                 |          |
| Yes                                                                         | –1.18      | (–5.37, 3.02)   | 0.58     |
| <i>Factors added by the researchers (Socio-demographic characteristics)</i> |            |                 |          |
| <b>Gender</b> (ref. Female)                                                 |            |                 |          |
| Male                                                                        | –12.02     | (–15.77, –8.27) | < 0.01*  |
| Other                                                                       | 6.13       | (–31.00, 43.27) | 0.75     |
| <b>Age</b>                                                                  | 7.66       | (1.06, 14.26)   | 0.02*    |
| <b>Country of birth</b> (ref. Spain)                                        |            |                 |          |
| Other                                                                       | –0.49      | (–6.69, 5.71)   | 0.88     |
| <b>PMA–R score</b>                                                          | –3.05      | (–3.41, –2.69)  | < 0.01*  |
| <b>Maternal occupational social class</b> (ref. Highly skilled)             |            |                 |          |

|                                                             |       |                |       |
|-------------------------------------------------------------|-------|----------------|-------|
| Non-manual                                                  | 5.84  | (0.42, 11.26)  | 0.04* |
| Manual                                                      | 11.42 | (-0.19, 23.04) | 0.05  |
| Other                                                       | 6.31  | (0.10, 12.52)  | 0.05  |
| <b>Struggling to afford basic needs (poverty) (ref. No)</b> |       |                |       |
| Yes                                                         | 13.37 | (4.03, 22.71)  | 0.01* |

Note: CI, confidence interval; HRT-SE, hit reaction time standard error. Model adjusted for: sex, age, country of birth, PMA-R, maternal occupational social class and poverty. Associations are estimated using conditional linear regression with school as strata. Association reported as percent change in the median of the outcome. \* statistical significance at the 0.05 level.

**Table S4.** Adjusted association between attentiveness (HRT–SE) and factors included in the questionnaire that showed a significant crude association (n = 1,658) when using class group as strata.

| Variables                                                               | Change (%) | 95% CI          | p-values |
|-------------------------------------------------------------------------|------------|-----------------|----------|
| <i>Category 1: Social relationships and interactions</i>                |            |                 |          |
| <b>Classmates relationship quality</b> (ref. Good)                      |            |                 |          |
| Not very good                                                           | 14.80      | (3.90, 25.71)   | 0.01*    |
| Bad                                                                     | 0.65       | (–21.64, 22.95) | 0.95     |
| <b>Peer and family conflict</b> (ref. No)                               |            |                 |          |
| Yes                                                                     | 5.44       | (0.54, 10.33)   | 0.03*    |
| <b>Feelings of love</b> (ref. No)                                       |            |                 |          |
| Yes, but it doesn't affect me                                           | 3.65       | (–1.01, 8.31)   | 0.13     |
| Yes, and it affects me                                                  | 1.94       | (–5.03, 8.91)   | 0.59     |
| <i>Category 2: Psychological and physical health</i>                    |            |                 |          |
| <b>Self-rated health</b> (ref. Good)                                    |            |                 |          |
| Regular                                                                 | 3.15       | (–1.72, 8.02)   | 0.20     |
| Bad                                                                     | 17.76      | (–0.04, 35.57)  | 0.05     |
| <b>Medication intake</b> (ref. No)                                      |            |                 |          |
| Yes                                                                     | 9.84       | (3.20, 16.48)   | < 0.01*  |
| <b>Period pain</b> (ref. No)                                            |            |                 |          |
| I am a boy                                                              | 0.23       | (–14.22, 14.68) | 0.98     |
| Yes, but I don't have it today                                          | 8.14       | (0.76, 15.52)   | 0.03*    |
| Yes, and today I have it                                                | 4.07       | (–6.19, 14.32)  | 0.44     |
| <i>Category 3 : Eating habits and addictive-substances consumption</i>  |            |                 |          |
| <b>Eating frequency</b> (ref. < 4 times)                                |            |                 |          |
| 4 times or more                                                         | –0.00      | (–0.06, 0.05)   | 0.89     |
| <b>Breakfast</b> (ref. No)                                              |            |                 |          |
| Yes                                                                     | –2.63      | (–7.74, 2.49)   | 0.31     |
| <b>Tobacco smoking</b> (ref. No)                                        |            |                 |          |
| Sometimes                                                               | 5.38       | (–2.01, 12.77)  | 0.15     |
| Yes                                                                     | 15.89      | (4.91, 26.86)   | 0.01*    |
| <b>Alcohol consumption</b> (ref. No)                                    |            |                 |          |
| Sometimes                                                               | 3.52       | (–1.67, 8.70)   | 0.18     |
| Yes                                                                     | 17.88      | (3.70, 32.06)   | 0.01*    |
| <b>Marijuana use</b> (ref. No)                                          |            |                 |          |
| Sometimes                                                               | 9.44       | (–0.81, 19.70)  | 0.07     |
| Yes                                                                     | 21.03      | (3.47, 38.60)   | 0.02*    |
| <b>Energy drinks consumption</b> (ref. No)                              |            |                 |          |
| Sometimes                                                               | 4.19       | (–0.82, 9.20)   | 0.10     |
| Yes                                                                     | 4.92       | (–1.16, 10.99)  | 0.11     |
| <i>Category 4: Use of technology and other habits</i>                   |            |                 |          |
| <b>Mobile phone use</b> (ref. Every 30 m or less)                       |            |                 |          |
| Between 30 m–60 m                                                       | –5.60      | (–10.04, –1.16) | 0.01*    |
| Every more than 60m                                                     | –5.31      | (–10.90, 0.27)  | 0.06     |
| I don't have mobile                                                     | –21.05     | (–39.29, –2.80) | 0.02*    |
| <b>Mobile notification</b> (ref. No)                                    |            |                 |          |
| No (ref.)                                                               |            |                 |          |
| Yes                                                                     | 2.16       | (–2.30, 6.63)   | 0.34     |
| <b>Weekly exercise hours</b> (ref. < 7 h)                               |            |                 |          |
| 7 h or more                                                             | –3.65      | (–8.10, 0.81)   | 0.11     |
| <b>Regular reader</b> (ref. No)                                         |            |                 |          |
| No (ref.)                                                               |            |                 |          |
| Yes                                                                     | –5.84      | (–10.29, –1.38) | 0.01*    |
| <i>Category 5: Other personal conditions before and during the test</i> |            |                 |          |
| <b>Need to go to the toilet</b> (ref. No)                               |            |                 |          |
| Yes                                                                     | 4.86       | (–1.28, 11.00)  | 0.12     |
| <b>Interest in the experiment</b> (ref. No)                             |            |                 |          |
| Yes                                                                     | –7.62      | (–14.09, –1.15) | 0.02*    |
| <b>Bad news received</b> (ref. No)                                      |            |                 |          |
| Yes                                                                     | 8.04       | (3.06, 13.01)   | < 0.01*  |
| <i>Category 6: Perceived classroom conditions during the test</i>       |            |                 |          |
| <b>Noise in classroom</b> (ref. No)                                     |            |                 |          |
| Yes                                                                     | –1.13      | (–5.36, 3.06)   | 0.60     |

Note: CI, confidence interval; HRT–SE, hit reaction time standard error. Model adjusted for: sex, age, country of birth, PMA–R, maternal occupational social class and poverty. Effects are calculated using conditional linear regression with class group as random effect. Association reported as percent change in the median of the outcome. \* statistical significance at the 0.05 level.



**Table S5.** Adjusted association between attentiveness (HRT–SE) and factors included in the questionnaire that showed a significant crude association (n = 1,658) stratified by gender

| Variables                                                               | FEMALE<br>Change (%) 95% CI | p-value | MALE<br>Change (%) 95% CI | p-value | P for<br>interaction <sup>a</sup> |
|-------------------------------------------------------------------------|-----------------------------|---------|---------------------------|---------|-----------------------------------|
| <i>Category 1: Social relationships and interactions</i>                |                             |         |                           |         |                                   |
| <b>Classmates relationship quality</b> (ref. Good)                      |                             |         |                           |         |                                   |
| Not very good                                                           | 17.43 (2.24, 32.63)         | 0.03*   | 10.38 (–5.61, 26.37)      | 0.20    | 0.77                              |
| Bad                                                                     | –6.13 (–30.42, 18.16)       | 0.62    | 9.83 (–38.29, 57.96)      | 0.69    |                                   |
| <b>Peer and family conflict</b> (ref. No)                               |                             |         |                           |         |                                   |
| Yes                                                                     | 7.47 (0.94, 13.99)          | 0.03*   | 3.95 (–3.73, 11.61)       | 0.31    | 0.64                              |
| <b>Feelings of love</b> (ref. No)                                       |                             |         |                           |         |                                   |
| Yes, but it doesn't affect me                                           | 4.31 (–2.42, 11.04)         | 0.21    | 2.83 (–3.82, 9.48)        | 0.40    | 0.94                              |
| Yes, and it affects me                                                  | 2.39 (–7.00, 11.79)         | 0.62    | 1.37 (–9.38, 12.13)       | 0.80    |                                   |
| <i>Category 2: Psychological and physical health</i>                    |                             |         |                           |         |                                   |
| <b>Self-rated health</b> (ref. Good)                                    |                             |         |                           |         |                                   |
| Regular                                                                 | –0.08 (–6.26, 6.10)         | 0.98    | 7.62 (–0.37, 15.60)       | 0.06    | 0.21                              |
| Bad                                                                     | 13.44 (–10.05, 37.38)       | 0.26    | 18.80 (–7.94, 45.55)      | 0.17    |                                   |
| <b>Medication intake</b> (ref. No)                                      |                             |         |                           |         |                                   |
| Yes                                                                     | 6.45 (–2.16, 15.05)         | 0.14    | 17.05 (6.06, 28.04)       | < 0.01* | 0.11                              |
| <b>Period pain</b> (ref. No)                                            |                             |         |                           |         |                                   |
| I am a boy                                                              | Not applicable              |         | Not applicable            |         |                                   |
| Yes, but I don't have it today                                          | 7.43 (0.06, 14.92)          | 0.05    |                           |         |                                   |
| Yes, and today I have it                                                | 2.63 (–7.93, 13.19)         | 0.63    |                           |         |                                   |
| <i>Category 3 : Eating habits and addictive-substances consumption</i>  |                             |         |                           |         |                                   |
| <b>Eating frequency</b> (ref. < 4 times)                                |                             |         |                           |         |                                   |
| 4 times or more                                                         | –0.03 (–0.11, 0.04)         | 0.39    | 0.01 (–0.07, 0.08)        | 0.89    | 0.20                              |
| <b>Breakfast</b> (ref. No)                                              |                             |         |                           |         |                                   |
| Yes                                                                     | –5.44 (–12.43, 1.55)        | 0.13    | 0.04 (–7.42, 7.49)        | 0.99    | 0.22                              |
| <b>Tobacco smoking</b> (ref. No)                                        |                             |         |                           |         |                                   |
| Sometimes                                                               | 4.84 (–4.66, 14.35)         | 0.32    | 7.60 (–4.43, 19.62)       | 0.13    | 0.32                              |
| Yes                                                                     | 10.68 (–2.95, 24.31)        | 0.12    | 24.70 (5.90, 43.49)       | 0.01*   |                                   |
| <b>Alcohol consumption</b> (ref. No)                                    |                             |         |                           |         |                                   |
| Sometimes                                                               | 1.31 (–5.44, 8.06)          | 0.70    | 7.55 (–0.65, 15.76)       | 0.20    | 0.31                              |
| Yes                                                                     | 19.09 (0.67, 37.51)         | 0.04*   | 17.98 (–4.96, 40.92)      | 0.02*   |                                   |
| <b>Marijuana use</b> (ref. No)                                          |                             |         |                           |         |                                   |
| Sometimes                                                               | 5.86 (–6.85, 18.57)         | 0.37    | 15.51 (–2.19, 33.22)      | 0.09    | 0.30                              |
| Yes                                                                     | 39.84 (7.96, 71.72)         | 0.01*   | 14.31 (–7.58, 36.19)      | 0.20    |                                   |
| <b>Energy drinks consumption</b> (ref. No)                              |                             |         |                           |         |                                   |
| Sometimes                                                               | 5.94 (–1.06, 12.94)         | 0.10    | 1.60 (–5.73, 8–93)        | 0.67    | 0.54                              |
| Yes                                                                     | 7.80 (–1.90, 17.50)         | 0.12    | 2.84 (–5.31, 10.99)       | 0.50    |                                   |
| <i>Category 4: Use of technology and other habits</i>                   |                             |         |                           |         |                                   |
| <b>Mobile phone use</b> (ref. Every 30 m or less)                       |                             |         |                           |         |                                   |
| Between 30 m–60 m                                                       | –6.07 (–12.17, 0.03)        | 0.05    | –4.20 (–10.81, 2.43)      | 0.22    | 0.82                              |
| Every more than 60 m                                                    | –0.90 (–9.41, 7.61)         | 0.84    | –8.64 (–16.27, –1.00)     | 0.03*   | 0.39                              |
| I don't have mobile                                                     | –18.67 (–43.27, 5.93)       | 0.12    | –25.52 (–52.60, 1.57)     | 0.07    |                                   |
| <b>Mobile notification</b> (ref. No)                                    |                             |         |                           |         |                                   |
| Yes                                                                     | –0.96 (–7.15, 5.24)         | 0.76    | 5.07 (–1.51, 11.65)       | 0.13    | 0.15                              |
| <b>Weekly exercise hours</b> (ref. < 7 h)                               |                             |         |                           |         |                                   |
| 7 h or more                                                             | –0.03 (–0.10, 0.04)         | 0.33    | –0.03 (–0.09, 0.03)       | 0.38    |                                   |
| <b>Regular reader</b> (ref. No)                                         |                             |         |                           |         |                                   |
| Yes                                                                     | –7.55 (–13.10, –1.99)       | 0.01*   | –2.94 (–10.58, 4.70)      | 0.45    | 0.24                              |
| <i>Category 5: Other personal conditions before and during the test</i> |                             |         |                           |         |                                   |
| <b>Need to go to the toilet</b> (ref. No)                               |                             |         |                           |         |                                   |
| Yes                                                                     | 6.60 (–2.05, 15.25)         | 0.14    | 0.77 (–7.96, 9.50)        | 0.86    | 0.34                              |
| <b>Interest in the experiment</b> (ref. No)                             |                             |         |                           |         |                                   |
| Yes                                                                     | –10.66 (–20.42, –0.89)      | 0.03*   | –5.05 (–13.99, 3.88)      | 0.27    | 0.28                              |
| <b>Bad news received</b> (ref. No)                                      |                             |         |                           |         |                                   |
| Yes                                                                     | 9.26 (2.53, 15.99)          | 0.01*   | 6.86 (–0.68, 14.40)       | 0.08    | 0.79                              |
| <i>Category 6: Perceived classroom conditions during the test</i>       |                             |         |                           |         |                                   |
| <b>Noise in classroom</b> (ref. No)                                     |                             |         |                           |         |                                   |
| Yes                                                                     | –2.00 (–7.78, 3.77)         | 0.50    | –0.02 (–6.14, 6.09)       | 0.99    | 0.40                              |

Note: CI, confidence interval; HRT–SE, hit reaction time standard error. Model adjusted for: age, country of birth, PMA–R, maternal occupational social class and poverty. Effects are calculated using conditional linear regression with school as random effect. Association reported as percent change in the median of the outcome.

<sup>a</sup> Excluding the participants having selected “Other” in gender group

\* statistical significance at the 0.05 level.

**Table S6.** Adjusted association between attentiveness (HRT–SE) and factors included in the questionnaire that showed a significant crude association (n = 1,658) stratified by maternal occupational social class.

| Factors                                                         | Maternal occupational social class  |         |                                 |         |                             |         |                            |         |      | P for interaction |
|-----------------------------------------------------------------|-------------------------------------|---------|---------------------------------|---------|-----------------------------|---------|----------------------------|---------|------|-------------------|
|                                                                 | Highly skilled<br>Change (%) 95% CI | p-value | Non-manual<br>Change (%) 95% CI | p-value | Manual<br>Change (%) 95% CI | p-value | Other<br>Change (%) 95% CI | p-value |      |                   |
| Category 1: Social relationships and interactions               |                                     |         |                                 |         |                             |         |                            |         |      |                   |
| Classmates relationship quality (ref. Good)                     |                                     |         |                                 |         |                             |         |                            |         |      |                   |
| Not very good                                                   | −0.10 (−18.28, 18.08)               | 0.99    | 21.18 (1.88, 40.48)             | 0.03*   | 40.80 (−39.36, 120.96)      | 0.32    | 23.72 (3.24, 44.20)        | 0.02*   | 0.18 |                   |
| Bad                                                             | −31.52 (−74.21, 11.17)              | 0.15    | −3.32 (−51.66, 45.02)           | 0.89    | −46.36 (−90.77, −1.96)      | 0.04*   | 14.31 (−18.09, 46.71)      | 0.39    |      |                   |
| Peer and family conflict (ref. No)                              |                                     |         |                                 |         |                             |         |                            |         |      |                   |
| No (ref.)                                                       |                                     |         |                                 |         |                             |         |                            |         |      |                   |
| Yes                                                             | 6.14 (−2.42, 14.71)                 | 0.16    | 3.34 (−5.11, 11.79)             | 0.44    | 2.68 (−18.11, 23.46)        | 0.80    | 9.24 (−0.32, 18.81)        | 0.06    | 0.78 |                   |
| Feelings of love (ref. No)                                      |                                     |         |                                 |         |                             |         |                            |         |      |                   |
| Yes, but it doesn't affect me                                   | 14.23 (5.59, 22.88)                 | < 0.01* | −4.23 (−11.69, 3.20)            | 0.26    | 20.05 (−5.00, 45.10)        | 0.12    | 0.05 (−9.03, 9.12)         | 0.99    | 0.05 |                   |
| Yes, and it affects me                                          | 1.70 (−10.90, 14.29)                | 0.79    | −1.29 (−13.09, 10.51)           | 0.83    | 18.23 (−18.98, 55.44)       | 0.34    | 1.79 (−10.90, 14.47)       | 0.78    |      |                   |
| Category 2: Psychological and physical health                   |                                     |         |                                 |         |                             |         |                            |         |      |                   |
| Self-rated health (ref. Good)                                   |                                     |         |                                 |         |                             |         |                            |         |      |                   |
| Regular                                                         | −0.92 (−8.73, 6.89)                 | 0.82    | 1.81 (−6.48, 10.11)             | 0.67    | 28.98 (−0.89, 58.85)        | 0.06    | 6.05 (−4.08, 16.17)        | 0.24    | 0.13 |                   |
| Bad                                                             | 21.23 (−18.83, 61.27)               | 0.30    | 38.02 (3.81, 72.24)             | 0.03*   | −5.05 (−63.48, 53.38)       | 0.87    | −0.92 (−26.52, 24.67)      | 0.94    |      |                   |
| Medication intake (ref. No)                                     |                                     |         |                                 |         |                             |         |                            |         |      |                   |
| Yes                                                             | 14.86 (3.43, 26.29)                 | 0.01*   | 5.18 (−6.04, 16.39)             | 0.37    | 0.40 (−30.68, 31.48)        | 0.98    | 10.20 (−3.28, 23.68)       | 0.14    | 0.64 |                   |
| Period pain (ref. No)                                           |                                     |         |                                 |         |                             |         |                            |         |      |                   |
| I am a boy                                                      | −4.41 (−31.73, 22.91)               | 0.75    | 7.36 (−20.08, 34.80)            | 0.60    | −5.60 (−31.23, 20.02)       | 0.67    | −6.61 (−28.78, 15.57)      | 0.56    | 0.17 |                   |
| Yes, but I don't have it today                                  | 8.31 (−4.28, 20.90)                 | 0.20    | 9.42 (−3.15, 22.00)             | 0.14    | 30.03 (−6.12, 66.18)        | 0.10    | −1.93 (−16.45, 12.59)      | 0.79    |      |                   |
| Yes, and today I have it                                        | 10.36 (−8.76, 29.47)                | 0.29    | −1.12 (−17.22, 14.98)           | 0.89    | 50.55 (−19.38, 120.49)      | 0.16    | −4.75 (−24.13, 14.63)      | 0.63    |      |                   |
| Category 3 : Eating habits and addictive-substances consumption |                                     |         |                                 |         |                             |         |                            |         |      |                   |
| Eating frequency (ref. < 4 times)                               |                                     |         |                                 |         |                             |         |                            |         |      |                   |
| 4 times or more                                                 | −0.06 (−0.16, 0.03)                 | 0.21    | 0.07 (−0.03, 0.16)              | 0.16    | 0.10 (−0.12, 0.31)          | 0.38    | −0.04 (−0.13, 0.05)        | 0.37    | 0.15 |                   |
| Breakfast (ref. No)                                             |                                     |         |                                 |         |                             |         |                            |         |      |                   |
| Yes                                                             | −5.64 (−14.83, 3.55)                | 0.23    | −3.96 (−12.61, 4.68)            | 0.37    | 7.85 (−16.70, 32.40)        | 0.53    | 2.27 (−7.01, 11.54)        | 0.63    | 0.73 |                   |
| Tobacco smoking (ref. No)                                       |                                     |         |                                 |         |                             |         |                            |         |      |                   |
| Sometimes                                                       | 9.75 (−2.48, 21.97)                 | 0.12    | −1.51 (−13.46, 10.45)           | 0.81    | 1.13 (−32.33, 34.60)        | 0.95    | 9.81 (−6.93, 26.45)        | 0.25    | 0.37 |                   |
| Yes                                                             | 11.36 (−6.44, 29.16)                | 0.21    | 7.79 (−11.05, 26.63)            | 0.42    | −0.36 (−43.88, 43.16)       | 0.99    | 41.57 (17.73, 65.42)       | < 0.01* |      |                   |
| Alcohol consumption (ref. No)                                   |                                     |         |                                 |         |                             |         |                            |         |      |                   |
| Sometimes                                                       | 3.41 (−5.14, 11.95)                 | 0.44    | 8.31 (−0.99, 17.62)             | 0.08    | 7.38 (−16.52, 31.27)        | 0.55    | −3.53 (−13.45, 6.38)       | 0.49    | 0.49 |                   |
| Yes                                                             | 13.05 (−9.72, 35.82)                | 0.26    | 21.48 (−9.02, 51.99)            | 0.17    | −13.21 (−47.89, 21.48)      | 0.46    | 32.94 (4.82, 61.06)        | 0.02*   |      |                   |
| Marijuana use (ref. No)                                         |                                     |         |                                 |         |                             |         |                            |         |      |                   |
| Sometimes                                                       | 15.94 (−4.89, 36.77)                | 0.13    | 5.39 (−9.88, 20.67)             | 0.49    | 39.92 (−19.86, 99.70)       | 0.19    | 10.28 (−9.91, 30.48)       | 0.32    | 0.17 |                   |
| Yes                                                             | 19.75 (−13.53, 53.04)               | 0.25    | 0.44 (−24.75, 25.63)            | 0.97    | −33.78 (−81.77, 14.22)      | 0.17    | 60.81 (22.17, 99.44)       | < 0.01* |      |                   |
| Energy drinks consumption (ref. No)                             |                                     |         |                                 |         |                             |         |                            |         |      |                   |
| Sometimes                                                       | 0.51 (−7.56, 8.58)                  | 0.90    | 5.69 (−3.07, 14.45)             | 0.20    | 22.13 (−3.81, 48.07)        | 0.10    | 4.17 (−5.91, 14.25)        | 0.42    | 0.85 |                   |
| Yes                                                             | −1.02 (−11.31, 9.27)                | 0.85    | 11.82 (0.66, 22.97)             | 0.04*   | 21.71 (−6.71, 50.13)        | 0.13    | 3.47 (−7.76, 14.69)        | 0.55    |      |                   |
| Category 4: Use of technology and other habits                  |                                     |         |                                 |         |                             |         |                            |         |      |                   |
| Mobile phone use (ref. Every 30 m or less)                      |                                     |         |                                 |         |                             |         |                            |         |      |                   |
| Between 30 m–60 m                                               | −5.19 (−12.66, 2.28)                | 0.17    | −3.67 (−11.50, 4.15)            | 0.36    | −13.13 (−32.14, 5.88)       | 0.18    | −6.19 (−15.12, 2.74)       | 0.17    | 0.88 |                   |
| Every more than 60 m                                            | −6.31 (−16.09, 3.47)                | 0.21    | −7.50 (−17.47, 2.47)            | 0.14    | −1.98 (−27.30, 23.34)       | 0.88    | −2.03 (−12.45, 8.39)       | 0.70    |      |                   |
| I don't have mobile                                             | −29.18 (−57.52, −0.84)              | 0.04*   | 2.27 (−50.19, 54.72)            | 0.93    | 0                           | 0       | −23.37 (−50.10, 3.37)      | 0.09    |      |                   |
| Mobile notification (ref. No)                                   |                                     |         |                                 |         |                             |         |                            |         |      |                   |
| Yes                                                             | 3.15 (−4.36, 10.67)                 | 0.41    | 0.29 (−7.52, 8.10)              | 0.94    | 12.12 (−9.93, 34.17)        | 0.28    | −0.47 (−9.03, 8.09)        | 0.92    | 0.42 |                   |

|                                                                         |                      |         |                       |       |                        |       |                        |       |      |
|-------------------------------------------------------------------------|----------------------|---------|-----------------------|-------|------------------------|-------|------------------------|-------|------|
| <b>Weekly exercise hours</b> (ref. < 7 h)                               |                      |         |                       |       |                        |       |                        |       |      |
| > 7 h                                                                   | 0.03 (−0.04, 0.11)   | 0.37    | −0.06 (−0.14, 0.03)   | 0.19  | 0.13 (−0.10, 0.36)     | 0.28  | −0.12 (−0.21, −0.03)   | 0.01* | 0.09 |
| <b>Regular reader</b> (ref. No)                                         |                      |         |                       |       |                        |       |                        |       |      |
| Yes                                                                     | −3.84 (−11.29, 3.60) | 0.31    | −8.27 (−15.85, −0.69) | 0.03* | −11.24 (−32.48, 10.00) | 0.30  | −2.81 (−12.21, 6.59)   | 0.56  | 0.76 |
| <b>Category 5: Other personal conditions before and during the test</b> |                      |         |                       |       |                        |       |                        |       |      |
| <b>Hours of sleep</b> (ref. < 6 h)                                      |                      |         |                       |       |                        |       |                        |       |      |
| Between 6 h and 7 h                                                     | 4.81 (−9.68, 19.31)  | 0.52    | −3.43 (−17.26, 10.40) | 0.63  | −12.58 (−42.81, 17.65) | 0.42  | −12.89 (−23.87, −1.91) | 0.02* | 0.44 |
| > 7 h                                                                   | 2.14 (−12.13, 16.42) | 0.77    | 3.98 (−11.20, 19.16)  | 0.61  | −9.89 (−40.51, 20.73)  | 0.53  | −10.22 (−21.72, 1.29)  | 0.08  |      |
| <b>Need to go to the toilet</b> (ref. No)                               |                      |         |                       |       |                        |       |                        |       |      |
| Yes                                                                     | −3.40 (−13.53, 6.73) | 0.51    | 11.00 (−0.34, 22.33)  | 0.06  | −5.77 (−29.84, 18.31)  | 0.64  | 7.50 (−3.90, 18.90)    | 0.20  | 0.30 |
| <b>Interest in the experiment</b> (ref. No)                             |                      |         |                       |       |                        |       |                        |       |      |
| Yes                                                                     | 1.72 (−11.92, 15.37) | 0.81    | −6.86 (−18.07, 4.36)  | 0.23  | −27.68 (−47.03, −8.33) | 0.01* | −13.05 (−23.82, −2.28) | 0.02* | 0.22 |
| <b>Bad news received</b> (ref. No)                                      |                      |         |                       |       |                        |       |                        |       |      |
| Yes                                                                     | 13.02 (4.42, 21.63)  | < 0.01* | 6.84 (−1.78, 15.45)   | 0.12  | 3.11 (−15.96, 23.19)   | 0.76  | 5.41 (−4.32, 15.14)    | 0.28  | 0.75 |
| <b>Category 6: Perceived classroom conditions during the test</b>       |                      |         |                       |       |                        |       |                        |       |      |
| <b>Noise in classroom</b> (ref. No)                                     |                      |         |                       |       |                        |       |                        |       |      |
| Yes                                                                     | −2.00 (−8.98, 4.98)  | 0.57    | 1.26 (−6.33, 8.86)    | 0.74  | −1.49 (−20.47, 17.50)  | 0.88  | −3.12 (−11.01, 4.77)   | 0.44  | 0.84 |

Note: CI, confidence interval; HRT–SE, hit reaction time standard error. Model adjusted for: age, sex, country of birth, PMA–R and poverty. Effects are calculated using conditional linear regression with school as random effect. Association reported as percent change in the median of the outcome. \* statistical significance at the 0.05 level.

**Table S7.** Adjusted association between secondary attention outcomes and factors included in the questionnaire that showed a significant crude association (n = 1,658)

| Variables                                                        | Impulsivity              |         | Selective attention score |         | Alerting score        |         | Orienting score        |         | Executive attention   |         |
|------------------------------------------------------------------|--------------------------|---------|---------------------------|---------|-----------------------|---------|------------------------|---------|-----------------------|---------|
|                                                                  | Change (count), 95% (CI) | p-value | Change (count), 95% (CI)  | p-value | Change (ms), 95% (CI) | p-value | Change (ms), 95% (CI)  | p-value | Change (ms), 95% (CI) | p-value |
| Category 1: Social relationships and interactions                |                          |         |                           |         |                       |         |                        |         |                       |         |
| Classmates relationship quality (ref. Good)                      |                          |         |                           |         |                       |         |                        |         |                       |         |
| Not very good                                                    | 0.41 (−0.43, 1.24)       | 0.34    | 0.22 (−0.10, 0.54)        | 0.18    | −3.38 (−15.84, 9.08)  | 0.60    | 9.00 (−3.12, 21.12)    | 0.15    | −0.29 (−10.58, 10.01) | 0.96    |
| Bad                                                              | 2.73 (0.79, 4.68)        | 0.01*   | 0.93 (0.18, 1.68)         | 0.02*   | 34.41 (5.39, 63.44)   | 0.02*   | −15.56 (−43.81, 12.69) | 0.28    | 51.65 (27.71, 75.60)  | < 0.01* |
| Peer and family conflict (ref. No)                               |                          |         |                           |         |                       |         |                        |         |                       |         |
| Yes                                                              | 0.49 (0.08, 0.90)        | 0.02*   | 0.03 (−0.13, 0.19)        | 0.71    | 6.24 (0.16, 12.32)    | 0.04*   | 1.25 (−4.67, 7.17)     | 0.68    | 1.86 (−3.20, 6.92)    | 0.47    |
| Feelings of love (ref. No)                                       |                          |         |                           |         |                       |         |                        |         |                       |         |
| Yes, but it doesn’t affect me                                    | 0.27 (−0.12, 0.66)       | 0.18    | −0.03 (−0.18, 0.12)       | 0.68    | 6.97 (1.07, 12.87)    | 0.02*   | −0.43 (−6.18, 5.32)    | 0.88    | 3.83 (−1.09, 8.75)    | 0.13    |
| Yes, and it affects me                                           | 0.53 (−0.07, 1.13)       | 0.09    | 0.05 (−0.18, 0.28)        | 0.69    | −0.84 (−9.80, 8.11)   | 0.85    | 6.01 (−2.72, 14.74)    | 0.18    | 1.37 (−6.10, 8.84)    | 0.72    |
| Category 2: Psychological and physical health                    |                          |         |                           |         |                       |         |                        |         |                       |         |
| Self-rated health (ref. Good)                                    |                          |         |                           |         |                       |         |                        |         |                       |         |
| Regular                                                          | 0.28 (−0.13, 0.69)       | 0.19    | 0.07 (−0.09, 0.23)        | 0.39    | 0.43 (−5.73, 6.60)    | 0.89    | 0.65 (−5.36, 6.65)     | 0.83    | −0.12 (−5.26, 5.02)   | 0.96    |
| Bad                                                              | −0.23 (−1.56, 1.10)      | 0.73    | 0.26 (−0.25, 0.78)        | 0.31    | 13.18 (−6.63, 32.98)  | 0.19    | −7.07 (−26.37, 12.22)  | 0.47    | 4.03 (−12.50, 20.56)  | 0.63    |
| Medication intake (ref. No)                                      |                          |         |                           |         |                       |         |                        |         |                       |         |
| Yes                                                              | 0.46 (−0.07, 0.99)       | 0.09    | 0.35 (0.14, 0.55)         | < 0.01* | 4.40 (−3.56, 12.35)   | 0.28    | 0.88 (−6.87, 8.63)     | 0.82    | −0.36 (−7.00, 6.27)   | 0.91    |
| Period pain (ref. No)                                            |                          |         |                           |         |                       |         |                        |         |                       |         |
| I am a boy                                                       | 0.70 (−0.57, 1.96)       | 0.28    | 0.09 (−0.40, 0.57)        | 0.73    | −3.84 (−22.77, 15.09) | 0.69    | −18.05 (−36.43, 0.33)  | 0.05    | −2.12 (−17.89, 13.66) | 0.79    |
| Yes, but I don’t have it today                                   | −0.24 (−0.85, 0.36)      | 0.43    | 0.08 (−0.15, 0.31)        | 0.51    | 1.93 (−7.05, 10.90)   | 0.67    | 0.24 (−8.47, 8.96)     | 0.96    | 0.60 (−6.88, 8.08)    | 0.88    |
| Yes, and today I have it                                         | −0.43 (−1.30, 0.43)      | 0.33    | −0.11 (−0.44, 0.23)       | 0.53    | 4.58 (−8.38, 17.55)   | 0.49    | −1.78 (−14.36, 10.81)  | 0.78    | 1.14 (−9.67, 11.94)   | 0.84    |
| Category 3 : Eating habits and addictive-substances consumption  |                          |         |                           |         |                       |         |                        |         |                       |         |
| Eating frequency (ref. < 4 times)                                |                          |         |                           |         |                       |         |                        |         |                       |         |
| 4 times or more                                                  | −0.31 (−0.77, 0.14)      | 0.18    | −0.21 (−0.36, −0.07)      | < 0.01* | 0.30 (−6.51, 7.10)    | 0.93    | 3.51 (−3.11, 10.13)    | 0.30    | −0.21 (−5.86, 5.44)   | 0.94    |
| Breakfast (ref. No)                                              |                          |         |                           |         |                       |         |                        |         |                       |         |
| Yes                                                              | −0.37 (−0.82, 0.08)      | 0.11    | −0.02 (−0.19, 0.16)       | 0.83    | −2.94 (−0.71, 3.84)   | 0.40    | −4.55 (−11.13, 2.03)   | 0.18    | 0.08 (−5.55, 5.71)    | 0.98    |
| Tobacco smoking (ref. No)                                        |                          |         |                           |         |                       |         |                        |         |                       |         |
| Sometimes                                                        | −0.26 (−0.86, 0.33)      | 0.39    | −0.03 (−0.26, 0.21)       | 0.84    | 5.44 (−3.76, 14.63)   | 0.25    | −1.53 (−10.49, 7.42)   | 0.74    | −4.33 (−11.73, 3.07)  | 0.25    |
| Yes                                                              | 0.64 (−0.17, 1.46)       | 0.12    | 0.47 (0.15, 0.79)         | < 0.01* | −7.24 (−19.69, 5.21)  | 0.26    | −0.96 (−13.08, 11.17)  | 0.88    | 3.64 (−6.33, 13.61)   | 0.47    |
| Alcohol consumption (ref. No)                                    |                          |         |                           |         |                       |         |                        |         |                       |         |
| Sometimes                                                        | 0.12 (−0.30, 0.55)       | 0.57    | 0.16 (−0.01, 0.32)        | 0.07    | 3.02 (−3.49, 9.54)    | 0.36    | 6.42 (0.07, 12.78)     | 0.05    | 3.25 (−2.04, 8.55)    | 0.23    |
| Yes                                                              | 1.56 (0.53, 2.59)        | < 0.01* | 0.52 (0.11, 0.92)         | 0.01*   | −6.29 (−22.07, 9.50)  | 0.44    | 13.48 (−1.90, 28.86)   | 0.09    | 8.35 (−4.45, 21.16)   | 0.20    |
| Marijuana use (ref. No)                                          |                          |         |                           |         |                       |         |                        |         |                       |         |
| Sometimes                                                        | 0.89 (0.08, 1.69)        | 0.03*   | 0.32 (0.00, 0.64)         | 0.05    | 5.77 (−6.54, 18.08)   | 0.36    | 10.79 (−1.21, 22.78)   | 0.08    | 0.94 (−8.90, 10.78)   | 0.85    |
| Yes                                                              | 1.84 (0.59, 3.09)        | < 0.01* | 0.95 (0.46, 1.46)         | < 0.01* | −6.32 (−25.44, 12.79) | 0.52    | 10.42 (−8.23, 29.08)   | 0.27    | 14.84 (−0.42, 30.10)  | 0.06    |
| Energy drinks consumption (ref. No)                              |                          |         |                           |         |                       |         |                        |         |                       |         |
| Sometimes                                                        | 0.13 (−0.29, 0.54)       | 0.55    | 0.10 (−0.06, 0.26)        | 0.23    | 3.11 (−3.16, 9.39)    | 0.33    | −1.50 (−7.62, 4.63)    | 0.63    | 0.69 (−4.54, 5.93)    | 0.80    |
| Yes                                                              | 0.34 (−0.16, 0.83)       | 0.18    | 0.19 (−0.01, 0.38)        | 0.06    | 2.21 (−5.36, 9.77)    | 0.57    | 2.13 (−5.25, 9.51)     | 0.57    | −4.87 (−11.18, 1.43)  | 0.13    |
| Category 4: Use of technology and other habits                   |                          |         |                           |         |                       |         |                        |         |                       |         |
| Mobile phone use (ref. Every 30 m or less)                       |                          |         |                           |         |                       |         |                        |         |                       |         |
| Between 30 m–60 m                                                | −0.55 (−0.96, −0.14)     | 0.01*   | −0.15 (−0.31, 0.01)       | 0.06    | −0.47 (−6.63, 5.69)   | 0.88    | −0.81 (−6.80, 5.19)    | 0.79    | −1.64 (−6.77, 3.48)   | 0.53    |
| Every more than 60m                                              | −0.46 (−0.97, 0.06)      | 0.08    | −0.13 (−0.33, 0.07)       | 0.21    | −0.12 (−7.87, 7.62)   | 0.98    | −1.19 (−8.73, 6.35)    | 0.76    | −4.63 (−11.08, 1.82)  | 0.16    |
| I don’t have mobile                                              | −0.88 (−2.90, 1.14)      | 0.39    | −0.44 (−1.22, 0.34)       | 0.27    | 11.15 (−19.15, 41.44) | 0.47    | 10.15 (−19.33, 39.63)  | 0.50    | 1.80 (−23.38, 26.98)  | 0.89    |
| Mobile notification (ref. No)                                    |                          |         |                           |         |                       |         |                        |         |                       |         |
| Yes                                                              | −0.16 (−0.55, 0.22)      | 0.41    | −0.09 (−0.24, 0.06)       | 0.22    | −0.67 (−6.40, 5.07)   | 0.82    | 4.29 (−1.28, 9.85)     | 0.13    | −2.40 (−7.16, 2.35)   | 0.32    |
| Weekly exercise hours (ref. < 7 h)                               |                          |         |                           |         |                       |         |                        |         |                       |         |
| 7 h or more                                                      | 0.11 (−0.29, 0.51)       | 0.59    | −0.10 (−0.26, 0.05)       | 0.19    | −3.35 (−9.31, 2.60)   | 0.21    | 3.37 (−2.45, 9.19)     | 0.26    | −0.52 (−5.50, 4.46)   | 0.84    |
| Regular reader (ref. No)                                         |                          |         |                           |         |                       |         |                        |         |                       |         |
| Yes                                                              | −0.25 (−0.67, 0.16)      | 0.23    | −0.15 (−0.31, 0.01)       | 0.06    | −0.06 (−6.27, 6.15)   | 0.98    | −2.53 (−8.55, 3.49)    | 0.41    | −0.43 (−5.58, 4.73)   | 0.87    |
| Category 5: Other personal conditions before and during the test |                          |         |                           |         |                       |         |                        |         |                       |         |
| Need to go to the toilet (ref. No)                               |                          |         |                           |         |                       |         |                        |         |                       |         |
| Yes                                                              | 0.11 (−0.40, 0.63)       | 0.67    | −0.03 (−0.23, 0.17)       | 0.77    | −4.09 (−11.74, 3.55)  | 0.29    | 1.16 (−6.28, 8.60)     | 0.76    | −0.81 (−7.15, 5.53)   | 0.80    |
| Interest in the experiment (ref. No)                             |                          |         |                           |         |                       |         |                        |         |                       |         |
| Yes                                                              | −0.47 (−1.09, 0.14)      | 0.13    | 0.26 (0.02, 0.49)         | 0.03    | 0.89 (−8.29, 10.06)   | 0.85    | 1.53 (−7.40, 10.46)    | 0.74    | −2.00 (−9.62, 5.62)   | 0.61    |
| Bad news received (ref. No)                                      |                          |         |                           |         |                       |         |                        |         |                       |         |
| Yes                                                              | 0.55 (0.15, 0.96)        | 0.01*   | 0.25 (0.10, 0.41)         | < 0.01* | 0.78 (−5.23, 6.79)    | 0.80    | 0.68 (−5.17, 6.54)     | 0.82    | 1.63 (−3.37, 6.62)    | 0.52    |
| Category 6: Perceived classroom conditions during the test       |                          |         |                           |         |                       |         |                        |         |                       |         |
| Noise in classroom (ref. No)                                     |                          |         |                           |         |                       |         |                        |         |                       |         |
| Yes                                                              | −0.01 (−0.05, 0.03)      | 0.58    | 0.11 (−0.03, 0.25)        | 0.12    | −3.32 (−8.82, 2.19)   | 0.24    | 0.95 (−4.41, 6.31)     | 0.73    | −4.83 (−9.40, −0.26)  | 0.04*   |

Note: CI, confidence interval; HRT–SE, hit reaction time standard error. Model adjusted for: sex, age, country of birth, PMA–R, maternal occupational social class and poverty. Associations are estimated using conditional linear regression with school as strata. Association reported as additive change in the mean of outcome. \* statistical significance at the 0.05 level.
